# Supplementary material for: A toolbox of astrocyte-specific, serotype-independent adeno-associated viral vectors using microRNA targeting sequences
Source: PubMed Central journal article supplement (PMC10654773; doi:10.1038/s41467-023-42746-w), 2023-11-16
Supplement: 41467_2023_42746_MOESM1_ESM.pdf [file 41467_2023_42746_MOESM1_ESM.pdf]

## Supplementary Figure 1

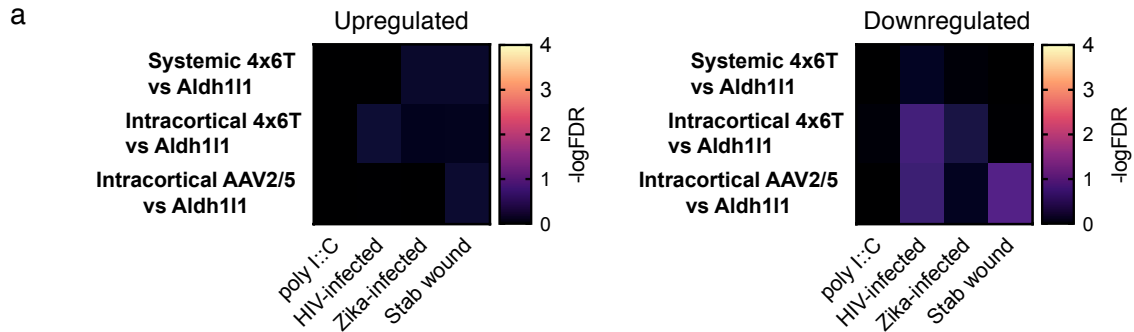

**Supplementary Figure 1. GSEA comparison of astrocytic gene changes induced by AAV transduction vs viral infection or stab wound.** a, Up- and down-regulated gene sets associated with astrocytic infection by HIV or Zika virus, viral mimetic poly I::C, or stab wound injury were compared with gene changes in AAV-transduced astrocytes (vs Aldh111-CreERT2 transcriptomes). None of these gene sets were enriched ( $FDR < 0.05$ ;  $-\log FDR > 1.30103$ ), suggesting that the gene changes induced by AAV transduction are not reminiscent of the gene changes astrocytes undergo in these pathologic conditions.
